# Supplementary material for: Improving Hereditary Hemorrhagic Telangiectasia Molecular Diagnosis: A Referral Center Experience
Source: MDPI journal article supplement (doi:10.3390/genes14030772), 2023-03-22
Supplement: s1 [file s1]

**Table S1.** Primers of *ENG* (NM\_001114753.3) and *ACVRL1* (NM\_000020.3) genes used for cDNA analysis.

| Primer name    | Primer sequence (5'→ 3')                                |
|----------------|---------------------------------------------------------|
| ENG 1-5Fw      | TG <b>T</b> AAAACGACGGCCAGTGCAGCCCTGCCACTGGACAC         |
| ENG 1-5Rev     | CAGGAAACAGCTATG <b>A</b> CCGAGCGTGC <b>G</b> GGCCCATGTC |
| ENG 8-12Fw     | TG <b>T</b> AAAACGACGGCCAGTCCTCCCAAGGACACTTGTAG         |
| ENG 8-12Rev    | CAGGAAACAGCTATG <b>A</b> CCAGCAGGCTCACACAGTTGC          |
| ACVRL1 4-7 Fw  | TG <b>T</b> AAAACGACGGCCAGTGTCTCTGGGCCTGTGGCATG         |
| ACVRL1 4-7 Rev | CAGGAAACAGCTATG <b>A</b> CCGTTCCCGGCTGCTCCGAAGG         |

The sequence in bold letters corresponds to M13.
