# Supplementary material for: Improving Hereditary Hemorrhagic Telangiectasia Molecular Diagnosis: A Referral Center Experience
Source: MDPI journal article supplement (doi:10.3390/genes14030772), 2023-03-22
Supplement: s1 [file s1]

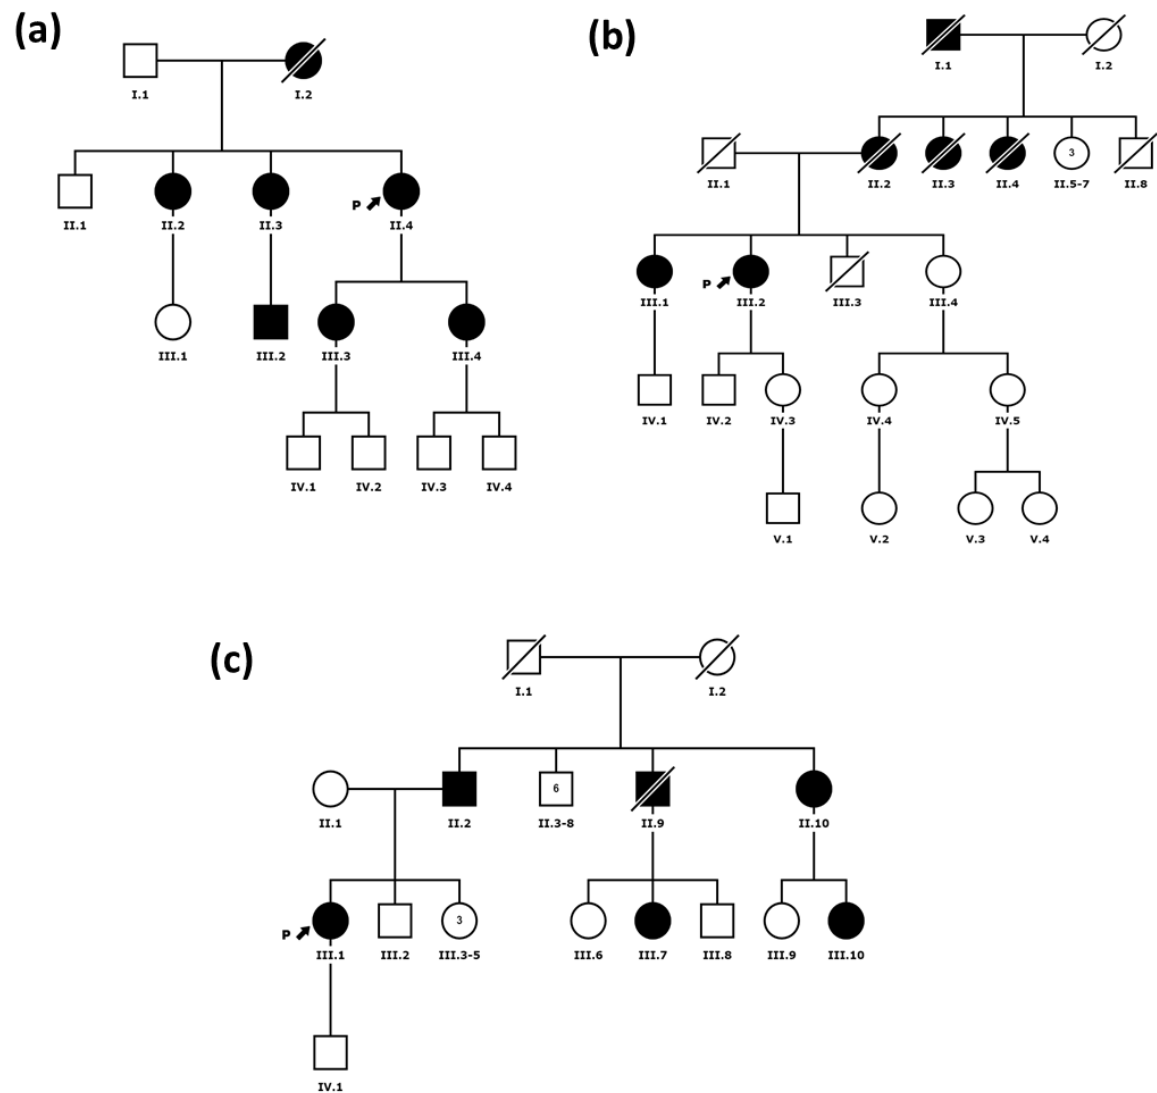

**Figure S1.** Pedigree of the three HHT affected patients carrying novel splicing variants reported. **(a)** Family tree of patient 1; **(b)** Family tree of patient 2 **(c)** Family tree of patient 3. Index patients are marked with an arrow, clinically affected HHT individuals are indicated by dark circles and squares.
